# Supplementary material for: Integrated multi-omics characterization reveals a distinctive metabolic signature and the role of NDUFA4L2 in promoting angiogenesis, chemoresistance, and mitochondrial dysfunction in clear cell renal cell carcinoma
Source: PubMed Central journal article supplement (PMC6326659; doi:10.18632/aging.101685), 2018-12-11
Supplement: aging-10-101685-s002.pdf [file aging-10-101685-s002.pdf]

## SUPPLEMENTARY TABLES

**Supplementary Table 1. Clinical and pathological characteristics of tissues collected from patients who underwent radical or partial nephrectomy for ccRCC.** These specimens were used for metabolomics analysis and to obtain primary cell cultures.

| Variable           | n=40      |
|--------------------|-----------|
| Age (years)        |           |
| median             | 52        |
| range              | 24-81     |
| Gender             |           |
| Male               | 26 (65%)  |
| Female             | 14 (35%)  |
| Dimensions (cm)    |           |
| median             | 5.5       |
| range              | 2 -12     |
| Pathological stage |           |
| pT1a               | 18 (45%)  |
| pT1b               | 12 (30%)  |
| pT2                | 5 (12.2%) |
| pT3                | 5 (12.5%) |
| pN+                | 2 (5%)    |
| cM+                | 2 (5%)    |
| Fuhrman grade      |           |
| G1-2               | 20 (50%)  |
| G3-4               | 20 (50%)  |

**Supplementary Table 2. ChemRich results.** Please browse Full text version to see the data

**Supplementary Table 3. NDUFA4L2 expression in ccRCC.** Data from 5 available datasets (Source: Oncomine, Compendia Bioscience, Ann Arbor, MI).

| Dataset          | Sample set                     | Measured genes | ccRCC samples examined | Normal samples examined | Fold change | p-value  |
|------------------|--------------------------------|----------------|------------------------|-------------------------|-------------|----------|
| <b>Gumz</b>      | ccRCC vs Normal                | 12,624         | 10                     | 10                      | 53.935      | 2.60E-11 |
| <b>Beroukhim</b> | Non-hereditary ccRCC vs Normal | 12,624         | 27                     | 11                      | 50.115      | 2.37E-14 |
| <b>Beroukhim</b> | Hereditary ccRCC vs Normal     | 12,624         | 32                     | 11                      | 75.690      | 5.55E-23 |
| <b>Jones</b>     | ccRCC vs Normal                | 12,624         | 23                     | 23                      | 8.361       | 7.32E-8  |
| <b>Lenburg</b>   | ccRCC vs Normal                | 17,779         | 9                      | 9                       | 23.340      | 5.51E-9  |
| <b>Yusenko</b>   | ccRCC vs Normal                | 17,779         | 26                     | 3                       | 86.565      | 7.04E-15 |

**Supplementary Table 4. Clinical and pathological characteristics.**

| Variable                                                       | n=390                                                     |
|----------------------------------------------------------------|-----------------------------------------------------------|
| <b>Age (years)</b><br>median<br>95% CI                         | 60<br>55-62                                               |
| <b>Gender</b><br>Male<br>Female                                | 258 (66%)<br>132 (34%)                                    |
| <b>Dimensions (cm)</b><br>median<br>95% CI                     | 5.0<br>4.5 - 5.5                                          |
| <b>Pathological stage</b><br>pT1a<br>pT1b<br>pT2<br>pT3<br>pT4 | 184 (47%)<br>100 (26%)<br>46 (12%)<br>42 (11%)<br>18 (4%) |
| pN+                                                            | 53 (13.6%)                                                |
| cM+                                                            | 44 (11.3%)                                                |
| <b>Fuhrman grade</b><br>G1-2<br>G3-4                           | 246 (63%)<br>144 (37%)                                    |
| <b>Follow-up</b><br>Median (months)<br>95% CI                  | 45<br>39 – 44                                             |

**Supplementary Table 5. Description of Metabolon QC Samples.**

| Type  | Description                                                                                 | Purpose                                                                                                                            |
|-------|---------------------------------------------------------------------------------------------|------------------------------------------------------------------------------------------------------------------------------------|
| MTRX  | Large pool of human plasma maintained by Metabolon that has been characterized extensively. | Assure that all aspects of Metabolon process are operating within specifications.                                                  |
| CMTRX | Pool created by taking a small aliquot from every customer sample.                          | Assess the effect of a non-plasma matrix on the Metabolon process and distinguish biological variability from process variability. |
| PRCS  | Aliquot of ultra-pure water                                                                 | Process Blank used to assess the contribution to compound signals from the process.                                                |
| SOLV  | Aliquot of solvents used in extraction.                                                     | Solvent blank used to segregate contamination sources in the extraction.                                                           |

**Supplementary Table 6. Metabolon QC Standards.**

| Type | Description             | Purpose                                                                      |
|------|-------------------------|------------------------------------------------------------------------------|
| DS   | Derivatization Standard | Assess variability of derivatization for GC/MS samples.                      |
| IS   | Internal Standard       | Assess variability and performance of instrument.                            |
| RS   | Recovery Standard       | Assess variability and verify performance of extraction and instrumentation. |

**Supplementary Table 7. Primers used for Real Time PCR.**

|          |                                                           |
|----------|-----------------------------------------------------------|
| PGAM4    | 5'-GAGCCCGACCATCCTTTCTA-3'<br>5'-CAGTACACGTTTCCCCTCCT-3'  |
| ENO2     | 5'-GAACAGTGAAGCCTTGGAGC-3'<br>5'-AAAGTCCTGGTAGAGTGCCC-3'  |
| ACLY     | 5'-AAGTGGGGTGACATCGAGTT-3'<br>5'-CTTTGGGGTTCAGCAAGGTC-3'  |
| GAL3ST1  | 5'-TGTTTCGAGTCCTCCTTCCAC-3'<br>5'-TTTCGGAGGTAGTGGGCATT-3' |
| ADDSSL1  | 5'-CGTGTATGGCGTGGTCAAAG-3'<br>5'-AATCCGTTGACCATGTGAGC-3'  |
| PFKFB4   | 5'-TGAGGTCATAGCTGCCAACA-3'<br>5'-TGGCCACATCCATGATCTT-3'   |
| CA9      | 5'-GCCGCTACTTCCAATATGAGG-3'<br>5'-CCTCAATCACTCGCCATTC-3'  |
| ACTL6A   | 5'-GCCAGTCTCCATCCTGTTCT-3'<br>5'-CAGTGGTATGAGTGGCTCCA-3'  |
| RUVBL1   | 5'-ATCGCTCCCATCGTCATCTT-3'<br>5'-TCATCACTCGGTCCAGAAGG-3'  |
| NDUFA4L2 | 5'-AGATCAAAGACATCCGGGGA-3'<br>5'-CGAGTCGCAGCAAGTAAAGC-3'  |
| ATG9A    | 5'-ATGTCTGCCCTTCCGTATTG-3'<br>5'-GCGGTGGTAGATGTCCAGTT-3'  |
| SPATA 18 | 5'-GAAGCTGTCACCAGGAGAGG-3'<br>5'-AGGACTCCGACTTCGAGACA-3'  |
| MRPS9    | 5'-CAAGGAATGGCCTTTAGCAA-3'<br>5'-GTCCTGTGTGATCGGGAAGT-3'  |
| MRPL3    | 5'-CCAAGGATGGTCAAAGCAT-3'<br>5'-CAGACAGGGTTGCCATTTTT-3'   |
| B-ACTIN  | 5'-AATCTGGCACCCACCTTCT-3'<br>5'-AGCCTGGATAGCAACGTACA-3'   |
